# Supplementary material for: Predicting MGMT Promoter Methylation in Diffuse Gliomas Using Deep Learning with Radiomics
Source: MDPI journal article supplement (doi:10.3390/jcm11123445), 2022-06-15
Supplement: s1 [file s1]

## Supplementary materials

**Table S1.** MRI protocol.

| Instrument         | Sequence | Slice<br>(mm) | Voxel size<br>(mm * mm * mm) | FOV<br>(mm * mm) | TR<br>(ms) | TE<br>(ms) | Bandwidth |
|--------------------|----------|---------------|------------------------------|------------------|------------|------------|-----------|
| uMR770<br>(3.0 T)  | DWI      | 6             | 1.67 * 1.67 * 6.00           | 240 * 230        | 1800       | 86         | 1790      |
|                    | T2WI     | 1             | 1 * 1 * 1                    | 256 * 272        | 1500       | 369.6      | 520       |
|                    | T1WI     | 6             | 1.02 * 0.76 * 6.00           | 220 * 220        | 230        | 4.49       | 260       |
|                    | T1CE     | 1             | 1.00 * 1.00 * 1.00           | 256 * 270        | 7.2        | 3.1        | 250       |
| Achieva<br>(3.0 T) | T2WI     | 6             | 0.55 * 0.68 * 6              | 230 * 184        | 2223       | 80         | 168.4     |
|                    | DWI      | 6             | 1.5 * 1.89 * 6               | 230 * 230        | 2359       | 89         | 20        |
|                    | T1WI     | 6             | 0.9 * 1.12 * 6               | 230 * 183        | 250        | 2.3        | 173.1     |
|                    | T1CE     | 6             | 0.65 * 0.82 * 6              | 230 * 183        | 230        | 2.3        | 216.6     |

Abbreviations: T1 weighted image (T1WI), T2 weighted image (T2WI),  
diffusion-weighted imaging (DWI), T1 contrast-enhanced (T1CE), repetition  
time (TR), echo time (TE), field of view (FOV)

**Table S2.** Importance of features of the best model

| Feature                                            | importance |
|----------------------------------------------------|------------|
| original_gldm_DependenceEntropy                    | 4292.799   |
| original_gldm_DependenceNonUniformity              | 4292.799   |
| original_gldm_DependenceNonUniformityNormalized    | 4292.799   |
| original_gldm_DependenceVariance                   | 4292.799   |
| original_gldm_GrayLevelNonUniformity               | 4292.799   |
| original_gldm_GrayLevelVariance                    | 4292.799   |
| original_gldm_HighGrayLevelEmphasis                | 4292.799   |
| original_gldm_LargeDependenceEmphasis              | 4292.799   |
| original_gldm_LargeDependenceHighGrayLevelEmphasis | 4292.799   |
| original_gldm_LargeDependenceLowGrayLevelEmphasis  | 4292.799   |
| original_gldm_LowGrayLevelEmphasis                 | 4292.799   |
| original_gldm_SmallDependenceEmphasis              | 4292.799   |
| original_gldm_SmallDependenceHighGrayLevelEmphasis | 4292.799   |
| original_gldm_SmallDependenceLowGrayLevelEmphasis  | 4292.799   |
| original_glszm_ZoneVariance                        | 4291.2104  |
| original_glszm_ZonePercentage                      | 4281.681   |
| original_glszm_ZoneEntropy                         | 4272.151   |

|                                                 |           |
|-------------------------------------------------|-----------|
| original_glszm_SmallAreaLowGrayLevelEmphasis    | 4262.62   |
| original_glszm_SmallAreaHighGrayLevelEmphasis   | 4253.0903 |
| original_glszm_SmallAreaEmphasis                | 4243.56   |
| original_glszm_SizeZoneNonUniformityNormalized  | 4234.0293 |
| original_glszm_SizeZoneNonUniformity            | 4224.4995 |
| original_glszm_LowGrayLevelZoneEmphasis         | 4214.969  |
| original_glszm_LargeAreaLowGrayLevelEmphasis    | 4205.4385 |
| original_glszm_LargeAreaHighGrayLevelEmphasis   | 4195.9087 |
| original_glszm_LargeAreaEmphasis                | 4186.378  |
| original_glszm_HighGrayLevelZoneEmphasis        | 4176.8477 |
| original_glszm_GrayLevelVariance                | 4167.3184 |
| original_glszm_GrayLevelNonUniformityNormalized | 4157.788  |
| original_glszm_GrayLevelNonUniformity           | 4148.2573 |
| original_glrlm_ShortRunLowGrayLevelEmphasis     | 4138.7275 |
| original_glrlm_ShortRunHighGrayLevelEmphasis    | 4129.197  |
| original_glrlm_ShortRunEmphasis                 | 4119.667  |
| original_glrlm_RunVariance                      | 4110.136  |
| original_glrlm_RunPercentage                    | 4100.6055 |
| original_glrlm_RunLengthNonUniformityNormalized | 4091.076  |
| original_glrlm_RunLengthNonUniformity           | 4081.5457 |
| original_glrlm_RunEntropy                       | 4072.0151 |
| original_glrlm_LowGrayLevelRunEmphasis          | 4062.4854 |
| original_glrlm_LongRunLowGrayLevelEmphasis      | 4052.955  |
| original_glrlm_LongRunHighGrayLevelEmphasis     | 4043.425  |
| original_glrlm_LongRunEmphasis                  | 4033.8945 |
| original_glrlm_HighGrayLevelRunEmphasis         | 4024.364  |
| original_glrlm_GrayLevelVariance                | 4017.4102 |
| original_glrlm_GrayLevelNonUniformityNormalized | 4013.0312 |
| original_glrlm_GrayLevelNonUniformity           | 4008.6516 |
| original_glcm_SumSquares                        | 4004.273  |
| original_glcm_SumEntropy                        | 3999.8943 |
| original_glcm_MaximumProbability                | 3995.5156 |
| original_glcm_InverseVariance                   | 3991.1362 |
| original_glcm_Idn                               | 3986.7578 |
| original_glcm_Id                                | 3982.379  |
| original_glcm_Idmn                              | 3978.0002 |
| original_glcm_Idm                               | 3973.621  |
| original_glcm_Imc2                              | 3969.242  |
| original_glcm_Imc1                              | 3964.8638 |
| original_glcm_JointEntropy                      | 3960.4846 |
| original_glcm_JointEnergy                       | 3956.1057 |
| original_glcm_DifferenceVariance                | 3951.727  |
| original_glcm_DifferenceEntropy                 | 3947.3481 |
| original_glcm_DifferenceAverage                 | 3942.969  |
| original_glcm_Correlation                       | 3938.5906 |
| original_glcm_Contrast                          | 3934.2112 |

|                                                 |           |
|-------------------------------------------------|-----------|
| original glcm ClusterTendency                   | 3929.833  |
| original glcm ClusterShade                      | 3925.454  |
| original glcm ClusterProminence                 | 3921.075  |
| original glcm JointAverage                      | 3916.6958 |
| original glcm Autocorrelation                   | 3912.317  |
| original firstorder Variance                    | 3907.9385 |
| original_firstorder_Uniformity                  | 3903.5596 |
| original_firstorder_TotalEnergy                 | 3899.1807 |
| original firstorder Skewness                    | 3894.8015 |
| original firstorder 10Percentile                | 3894.072  |
| original firstorder 90Percentile                | 3894.072  |
| original_firstorder_Energy                      | 3894.072  |
| original firstorder Entropy                     | 3894.072  |
| original firstorder InterquartileRange          | 3894.072  |
| original firstorder Kurtosis                    | 3894.072  |
| original firstorder Maximum                     | 3894.072  |
| original firstorder MeanAbsoluteDeviation       | 3894.072  |
| original firstorder Mean                        | 3894.072  |
| original_firstorder_Median                      | 3894.072  |
| original_firstorder_Minimum                     | 3894.072  |
| original firstorder Range                       | 3894.072  |
| original firstorder RobustMeanAbsoluteDeviation | 3894.072  |
| original firstorder RootMeanSquared             | 3894.072  |

---

Notes: The numerical value listed in S2 is to visualize the contribution and response of features to the model. the values reflect the importance of features. The larger the value is, the more important the feature is. The values have been calculated via class activation maps (CAMs), which can serve as a quality assurance tool such that they highlight image regions relevant to the model's prediction and denote the model's confidence in the prediction.

| Layer Name      | Output Size                | ResNet-18                                                                                                    |
|-----------------|----------------------------|--------------------------------------------------------------------------------------------------------------|
| conv1           | $112 \times 112 \times 64$ | $7 \times 7, 64$ , stride 2                                                                                  |
| conv2_x         | $56 \times 56 \times 64$   | $3 \times 3$ max pool, stride 2<br>$\begin{bmatrix} 3 \times 3, 64 \\ 3 \times 3, 64 \end{bmatrix} \times 2$ |
| conv3_x         | $28 \times 28 \times 128$  | $\begin{bmatrix} 3 \times 3, 128 \\ 3 \times 3, 128 \end{bmatrix} \times 2$                                  |
| conv4_x         | $14 \times 14 \times 256$  | $\begin{bmatrix} 3 \times 3, 256 \\ 3 \times 3, 256 \end{bmatrix} \times 2$                                  |
| conv5_x         | $7 \times 7 \times 512$    | $\begin{bmatrix} 3 \times 3, 512 \\ 3 \times 3, 512 \end{bmatrix} \times 2$                                  |
| average pool    | $1 \times 1 \times 512$    | $7 \times 7$ average pool                                                                                    |
| fully connected | 1000                       | $512 \times 1000$ fully connections                                                                          |
| softmax         | 1000                       |                                                                                                              |

**Figure S1. Residual Network architecture**

## Supplementary methods

Evaluation metrics for prediction results.

### 1) Classification accuracy

The percentage of predicted values that exactly match with actual values.

As five-fold cross validation was used, the average value of the accuracy score in five folds is calculated and used for model selection.

$$Accuracy_i = \frac{\text{No. of correct predictions}_i}{\text{Total No. of predictions}_i} = \frac{TP+TN}{(TP+FN)+(FP+TN)}$$

$$\overline{Accuracy} = \frac{1}{5} \sum_{i=1}^5 Accuracy_i$$

Where  $Accuracy_i$  is the accuracy score of the  $i^{th}$  fold, and  $\overline{Accuracy}$  is the average accuracy of five folds.

## 2) F1 Score

F1 Score is a weighted average of the precision and recall where the precision is the number of true positive results divided by the number of all positive results, and the recall is the number of true positive results divided by the number of all samples that should have been identified as positive. F1 Score is a better metric when the dataset is imbalanced and biased.

$$F1\ Score = 2 \times \frac{Precision \times Recall}{Precision + Recall} = \frac{2 \times TP}{2 \times TP + FP + FN}$$

## 3) Other metrics:

AUC = area under receiver operating characteristic curve

$$\text{Sensitivity (SENS)} = \frac{TP}{TP + FN}$$

$$\text{Specificity (SPEC)} = \frac{TN}{FP + TN}$$

$$\text{Positive Predictive Value (PPV)} = \frac{TP}{TP + FP}$$

$$\text{Negative Predictive Value (NPV)} = \frac{TN}{TN + FN}$$

$$\text{Mathew's Correlation Coefficient (MCC)} \\ = \frac{TP \times TN - FP \times FN}{\sqrt{(TP + FP)(TP + FN)(TN + FP)(TN + FN)}}$$

where TP, FP, TN and FN represent the regions of the true positive, the false positive, true negative and the false negative, respectively.
